# Supplementary material
Source: Springer Nature journal article supplement (https://www.springermedizin.de/resource/supplementary/12986_2009_231_MOESM10_ESM.pdf/25655638)
Supplement: MOESM10 [file 25655638]

**Table. 2 Initial body weight, final body weight, food intake, energy intake, liver weight, and fat pad weight**

| Strain      | Diet     | Body weights |            |            |            | Food intake  | Energy intake | Liver weight  | Fat pad weight <sup>1</sup> |
|-------------|----------|--------------|------------|------------|------------|--------------|---------------|---------------|-----------------------------|
|             |          | 0 week       | 2 weeks    | 8 weeks    | 16 weeks   | g/day        | cal/day       | g/rat         | g/rat                       |
|             |          | g            | g          | g          | g          |              |               |               |                             |
| LETO        | Standard | 91.5 ± 1.9 b | 189 ± 14 b | 365 ± 10 d | 461 ± 13 d | 18.2 ± 0.4 c | 71.9 ± 1.7 d  | 9.49 ± 0.28 c | 25.0 ± 2.4 d                |
|             | High fat | 89.4 ± 1.3 b | 195 ± 2 b  | 420 ± 6 c  | 551 ± 28 c | 15.8 ± 0.2 d | 80.5 ± 1.2 c  | 9.74 ± 0.34 c | 47.2 ± 3.1 c                |
| OLETF       | Standard | 114 ± 1.9 a  | 242 ± 3 a  | 500 ± 6 b  | 655 ± 35 b | 25.1 ± 0.5 a | 99.5 ± 1.7 b  | 17.2 ± 0.67 b | 76.1 ± 2.3 b                |
|             | High fat | 114 ± 1.5 a  | 258 ± 7 a  | 606 ± 16 a | 769 ± 49 a | 22.8 ± 0.4 b | 116 ± 2.5 a   | 22.6 ± 0.81 a | 114 ± 4.3 a                 |
| 2-way ANOVA | Strain   | < 0.01       | < 0.01     | < 0.01     | < 0.01     | < 0.01       | < 0.01        | < 0.01        | < 0.01                      |
|             | Diet     | 0.52         | 0.03       | < 0.01     | 0.06       | < 0.01       | < 0.01        | < 0.01        | < 0.01                      |
|             | S x D    | 0.54         | 0.43       | 0.12       | < 0.01     | 0.93         | 0.04          | < 0.01        | 0.92                        |

Each value represents mean ± SEM, n = 9. Means without a common letter differ, P < 0.05.

<sup>1</sup> Fat pad weight: sum of mesenteric, epididymal and retroperitoneal fat pads weights
